# Supplementary material
Source: MDPI journal article supplement (https://www.mdpi.com/2227-9717/12/3/612)
Supplement: s1 [file s1]

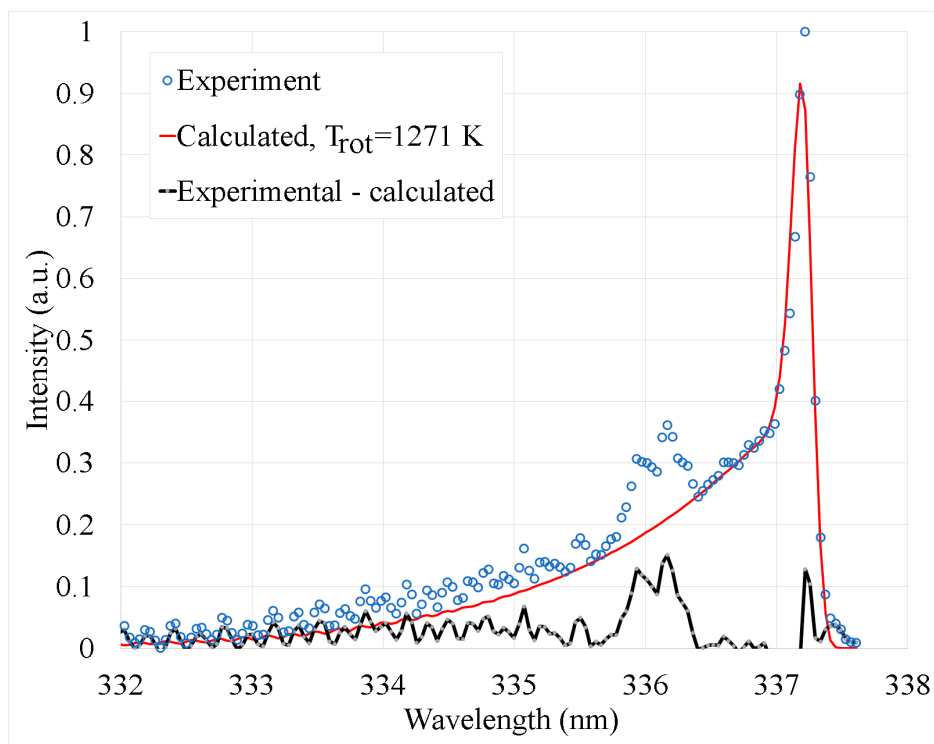

**Figure S1.** NH(A-X,0-0) band spectrum.

Registered and calculated  $N_2(C-B, 0-0)$  spectra, and their difference revealing the NH(A-X,0-0) band spectrum. Distance  $x = 0$ . The  $N_2(C,0)$  rotational temperature,  $T_{\text{rot}} = 1271$  K, was determined on the basis transition  $N_2(C-B,0-2)$  spectrum as described in the paper. The registered and calculated spectra were fitted at 336.6–337 nm where the NH(A-X,0-0) intensity is low [1].

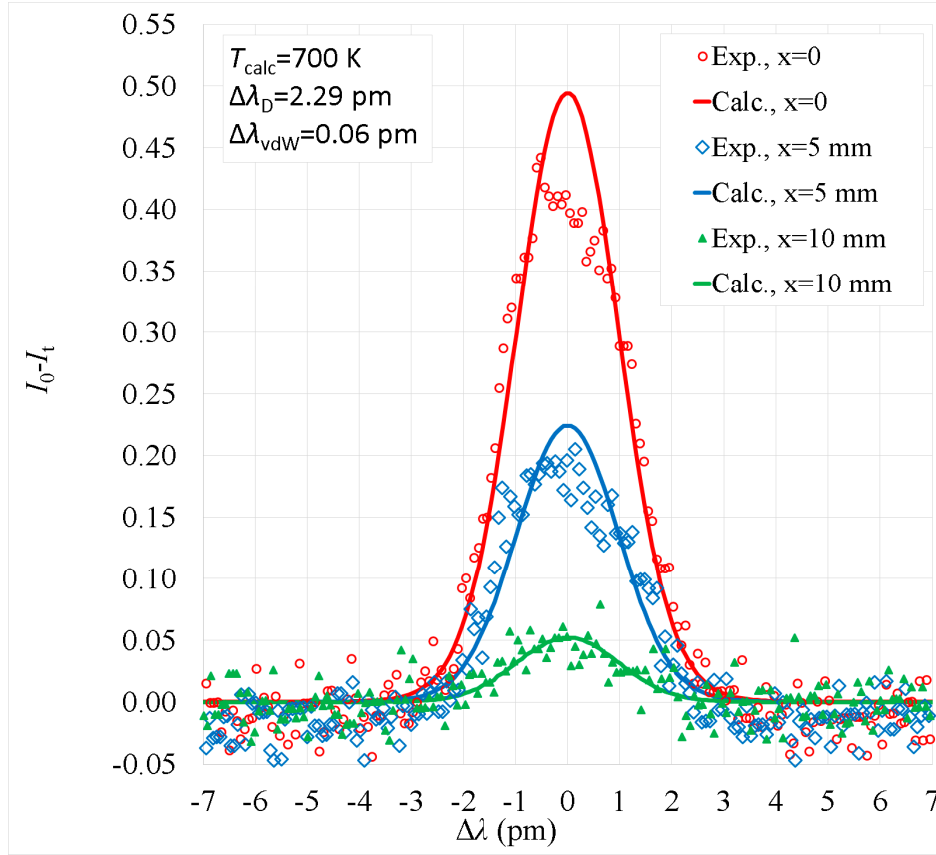

**Figure S2.** Temperature estimation from Ar ( $1s_5 \rightarrow 2p_6$ ) line shape analysis.  $I_0$ - the incident light intensity,  $I_t$ - the transmitted light intensity.

The absorption profile of the Ar spectral line  $\lambda_0 = 763.5106$  nm (transition  $1s_5 \rightarrow 2p_6$ ) [2], determined by TDLAS measurements, was fitted with a Voigt profile. Satisfactory fitting was found using the same temperature, 700 K, in the case of all experimental profiles. Two spectral line broadening mechanisms were considered: Doppler (Gaussian profile) and van der Waals (Lorentzian profile) broadening. The full width at half maximum (FWHM) of the Doppler broadening was calculated

as  $\Delta\lambda_D = \sqrt{\frac{8 \cdot k_B \cdot T_g \cdot \ln(2)}{m_{Ar} \cdot c^2}} \cdot \lambda_0$ , where  $k_B$  is Boltzmann's constant,  $T_g$ - the gas temperature,  $m_{Ar}$ - the mass of Ar atom,  $c$ - the speed of light. The FWHM of van der Waals broadening was calculated

as  $\Delta\lambda_{vdW} = 8.18 \cdot 10^{-26} \cdot \lambda_0^2 \cdot \left(\alpha \cdot \langle \bar{R}^2 \rangle\right)^{2/5} \cdot \left(\frac{T_g}{\mu}\right)^{3/10} \cdot N$  [3]. Here,  $\lambda_0$  is in nm,  $\alpha$  - the atomic polarizability of the neutral perturber ( $16.54 \cdot 10^{-25}$  cm<sup>3</sup>),  $T_g$  is in K,  $N$ - the concentration of atoms in cm<sup>-3</sup>,  $\mu$ - reduced mass of the colliding atoms in AMU (for Ar  $\mu \approx 20$ ).  $\langle \bar{R}^2 \rangle = \langle \bar{R}_U^2 \rangle - \langle \bar{R}_L^2 \rangle$ , with  $\langle \bar{R}_U^2 \rangle$  and  $\langle \bar{R}_L^2 \rangle$  been the mean square radiuses (in Bohr radius units) of the atom in upper and lower levels and  $\langle \bar{R}_{U|L}^2 \rangle = \frac{1}{2} \cdot n^{*2} [5n^{*2} + 1 - 3l_{U|L}(l_{U|L} + 1)]$ . In this formula  $l_U = 1$  and  $l_L = 0$  are the orbital angular momentum quantum numbers and  $n^{*2} = \frac{E_H^i}{E_{Ar}^i - E_{2p6}}$  is the effective quantum number with ionization potentials  $E_H^i = 13.60$  eV and  $E_{Ar}^i = 15.76$  eV of hydrogen and argon atoms and  $E_{2p6} = 13.17$  eV is the energy of Ar( $2p_6$ ) atom [2].

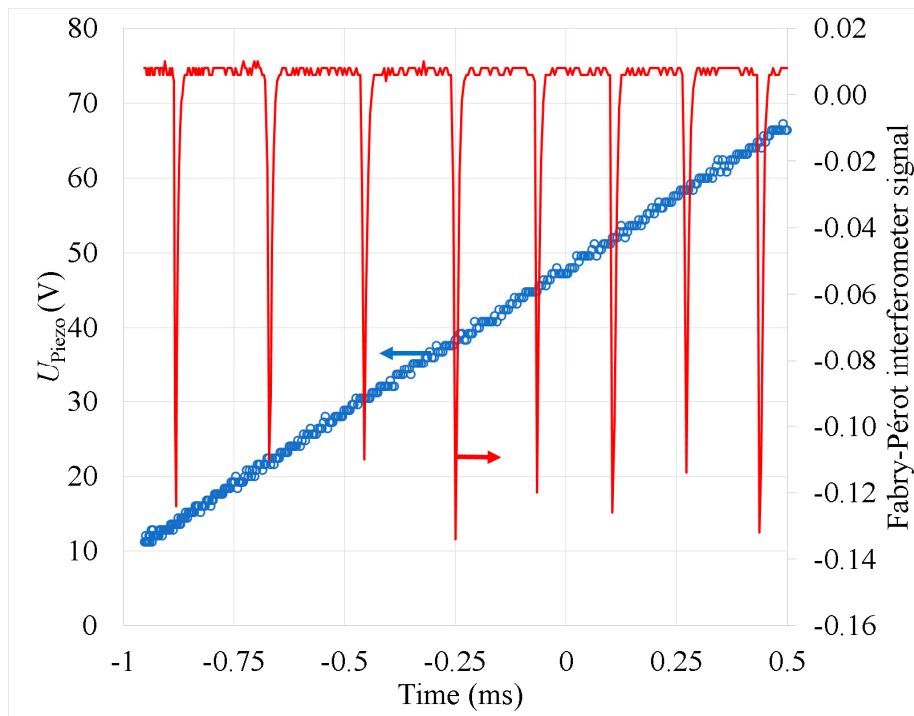

**Figure S3.** TDLAS laser stability on the basis of Fabry-Pérot interferometer signal.

Example of Fabry-Pérot interferometer signal in response to the linear increase in the voltage on the piezoelectric element ( $U_{\text{Piezo}}$ ) that changed the laser resonator length. The dependence of the Fabry-Pérot interferometer signal on time was used to determine the laser wavelength change and check the laser operation stability.

## Reference

1. Sekiya, H.; Nishiyama, N.; Tsuji, M.; Nishimura, Y. Nascent Vibrational and Rotational Distributions of NH(A) in the Dissociative Excitation of NH<sub>3</sub> by Ar(3P<sub>2</sub>,0) at Thermal Energy. *J. Chem. Phys.* **1987**, *86*, 163–169.
2. Kramida, A.; Ralchenko, Y.; Reader, J.; NIST ASD Team NIST Atomic Spectra Database Available online: <https://physics.nist.gov/asd>.
3. Muñoz, J.; Dimitrijević, M.S.; Yubero, C.; Calzada, M.D. Using the van Der Waals Broadening of Spectral Atomic Lines to Measure the Gas Temperature of an Argon-Helium Microwave Plasma at Atmospheric Pressure. *Spectrochim. Acta - Part B At. Spectrosc.* **2009**, *64*, 167–172, doi:10.1016/j.sab.2008.11.006.
